# Supplementary material for: The LINC00922 aggravates ovarian cancer progression via sponging miR-361-3p
Source: PubMed Central journal article supplement (PMC8194245; doi:10.1186/s13048-021-00828-7), 2021-06-11

**a. Potential binding of miRNAs to *linc00922***

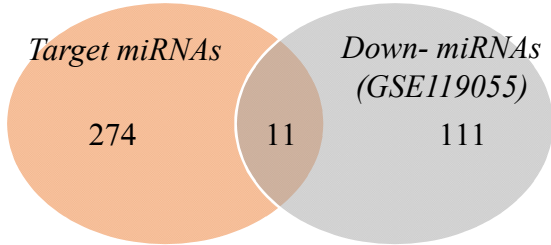

**b. Potential target genes of the miRNAs**

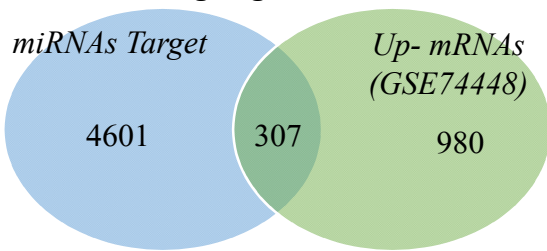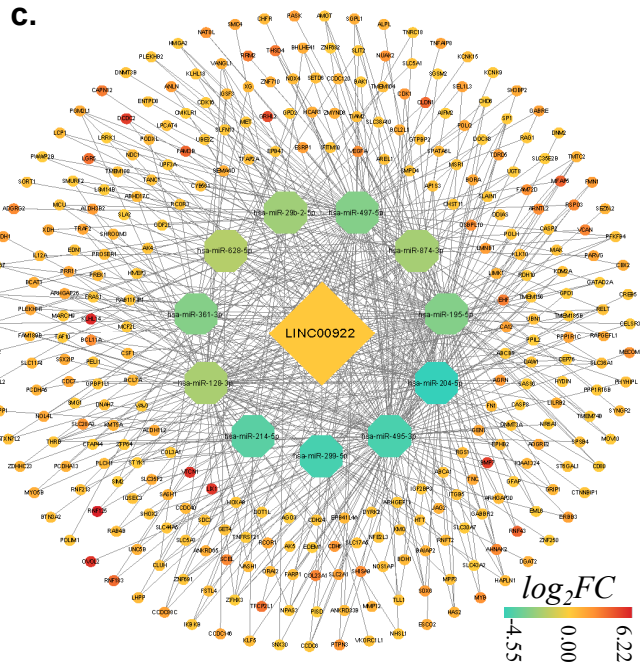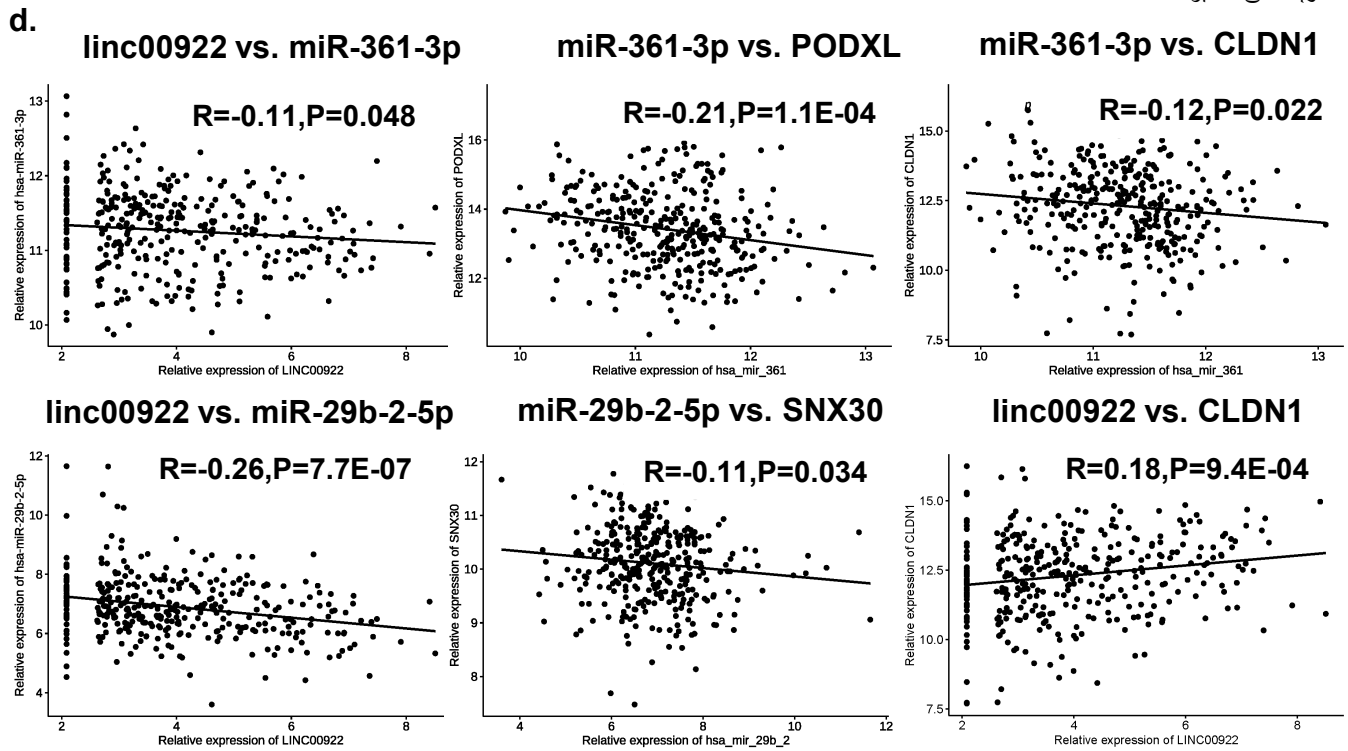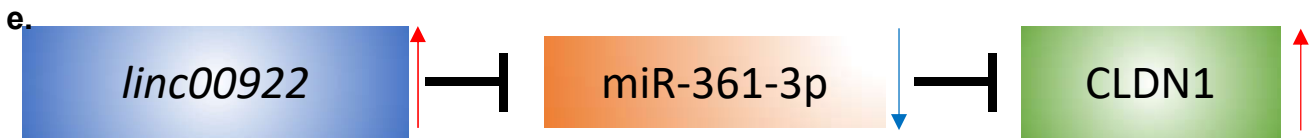

Supplement: 13048_2021_828_MOESM4_ESM.pdf [file 13048_2021_828_MOESM4_ESM.pdf]
